# Supplementary material
Source: Springer Nature journal article supplement (https://www.springermedizin.de/resource/supplementary/13006_2007_47_MOESM3_ESM.pdf/9627914)

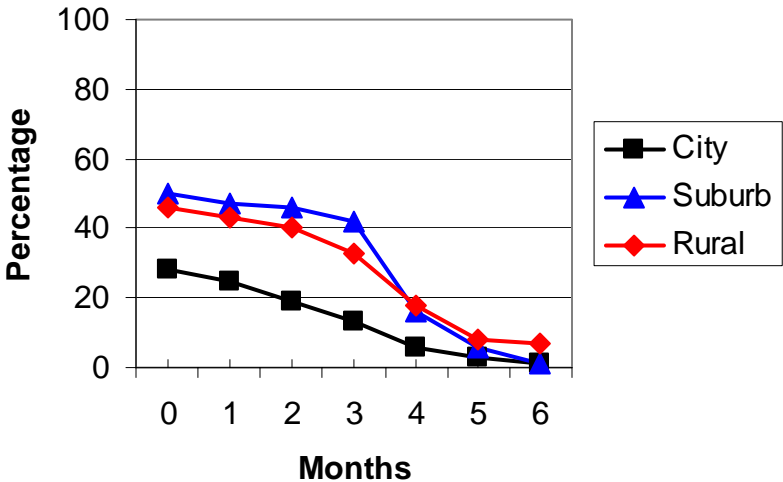

Supplement: MOESM3 [file 9627914]
